# Supplementary material for: Switching from zoledronic acid to denosumab increases the risk for developing medication-related osteonecrosis of the jaw in patients with bone metastases
Source: PubMed Central journal article supplement (PMC8110486; doi:10.1007/s00280-021-04262-w), 2021-03-31
Supplement: 280_2021_4262_MOESM1_ESM.pdf [file 280_2021_4262_MOESM1_ESM.pdf]

## Supplementary Table

**Title:** Switching from zoledronic acid to denosumab increases the risk for developing medication-related osteonecrosis of the jaw in patients with bone metastases

**Authors:** Ikesue H, Doi K, Morimoto M, Hirabatake M, Muroi N, Yamamoto S, Takenobu T, and Hashida T.

**Supplementary Table S1.** Univariate and multivariate analyses of risk factors for medication-related osteonecrosis of the jaw in patients who received denosumab or zoledronic acid for bone metastases

| Variables                                             | Univariate analysis |                 | Multivariate analysis |                 |
|-------------------------------------------------------|---------------------|-----------------|-----------------------|-----------------|
|                                                       | HR (95% CI)         | <i>P</i> -value | HR (95% CI)           | <i>P</i> -value |
| Bone-modifying agents                                 |                     |                 |                       |                 |
| ZA (control)                                          | 1.00                | –               | 1.00                  | –               |
| Denosumab                                             | 2.32 (1.34–4.17)    | 0.002           | 2.41 (1.37–4.39)      | 0.002           |
| ZA followed by denosumab                              | 3.63 (1.41–8.36)    | 0.010           | 4.36 (1.63–10.54)     | 0.005           |
| Tooth extraction after starting BMAs                  | 4.38 (2.55–7.30)    | <0.001          | 4.86 (2.75–8.36)      | <0.001          |
| Concomitant use of antiangiogenic agents <sup>a</sup> | 2.24 (1.35–3.67)    | 0.002           | 1.78 (1.06–2.96)      | 0.030           |
| Tooth extraction before starting BMAs                 | 1.94 (1.16–3.19)    | 0.012           | 1.36 (0.79–2.28)      | 0.261           |
| Concomitant use of corticosteroids                    | 0.99 (0.53–1.75)    | 0.983           | N/A                   |                 |
| Age (years)                                           | 1.01 (0.99–1.03)    | 0.503           | N/A                   |                 |
| Male sex                                              | 0.98 (0.60–1.61)    | 0.949           | N/A                   |                 |
| Diabetes                                              | 0.49 (0.12–1.40)    | 0.201           | N/A                   |                 |

BMA, bone modifying agent; CI, confidence interval; HR, hazard ratio; ZA, zoledronic acid.

N/A indicates that the covariate was not included in the model because it was not significant in univariate analyses.

<sup>a</sup> Includes axitinib, bevacizumab, everolimus, lenvatinib, pazopanib, ramucirumab, regorafenib, sorafenib, sunitinib, and temsirolimus
